# Supplementary material for: NuMA Overexpression in Epithelial Ovarian Cancer
Source: PubMed Central journal article supplement (PMC3375276; doi:10.1371/journal.pone.0038945), 2012-06-14
Supplement: pone.0038945.s003.pdf [file pone.0038945.s003.pdf]

A

IHC NuMA stain

IHC H&E stain

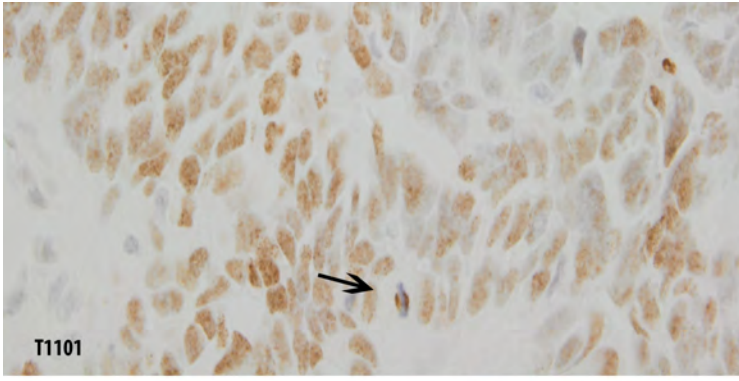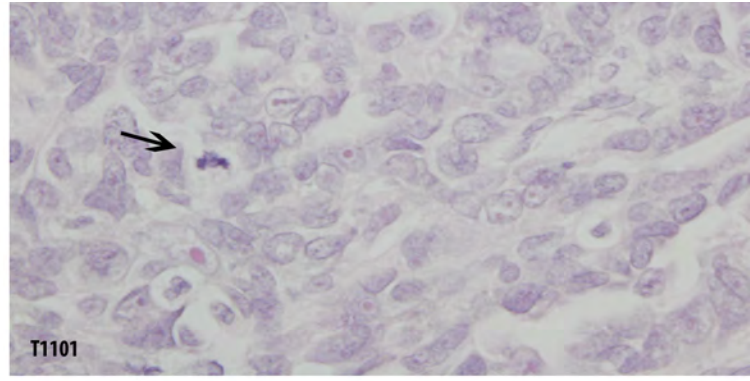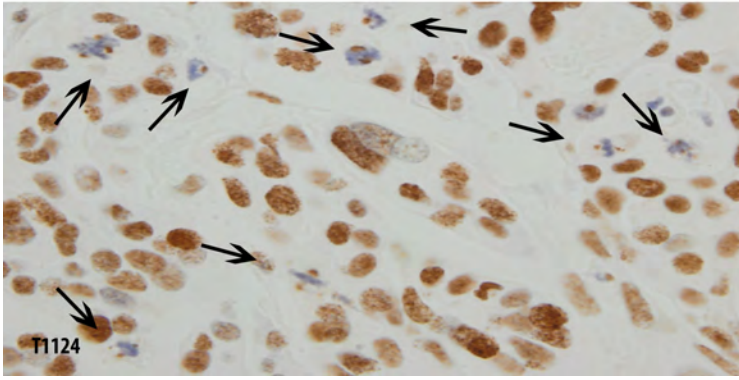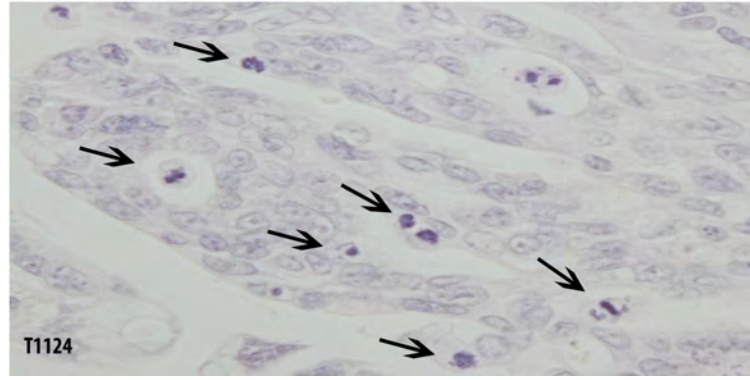

Supp Fig 3
